# Supplementary material for: Component Parts of Bacteriophage Virions Accurately Defined by a Machine-Learning Approach Built on Evolutionary Features
Source: PubMed Central journal article supplement (PMC8269216; doi:10.1128/msystems.00242-21), 2021-05-27

**a**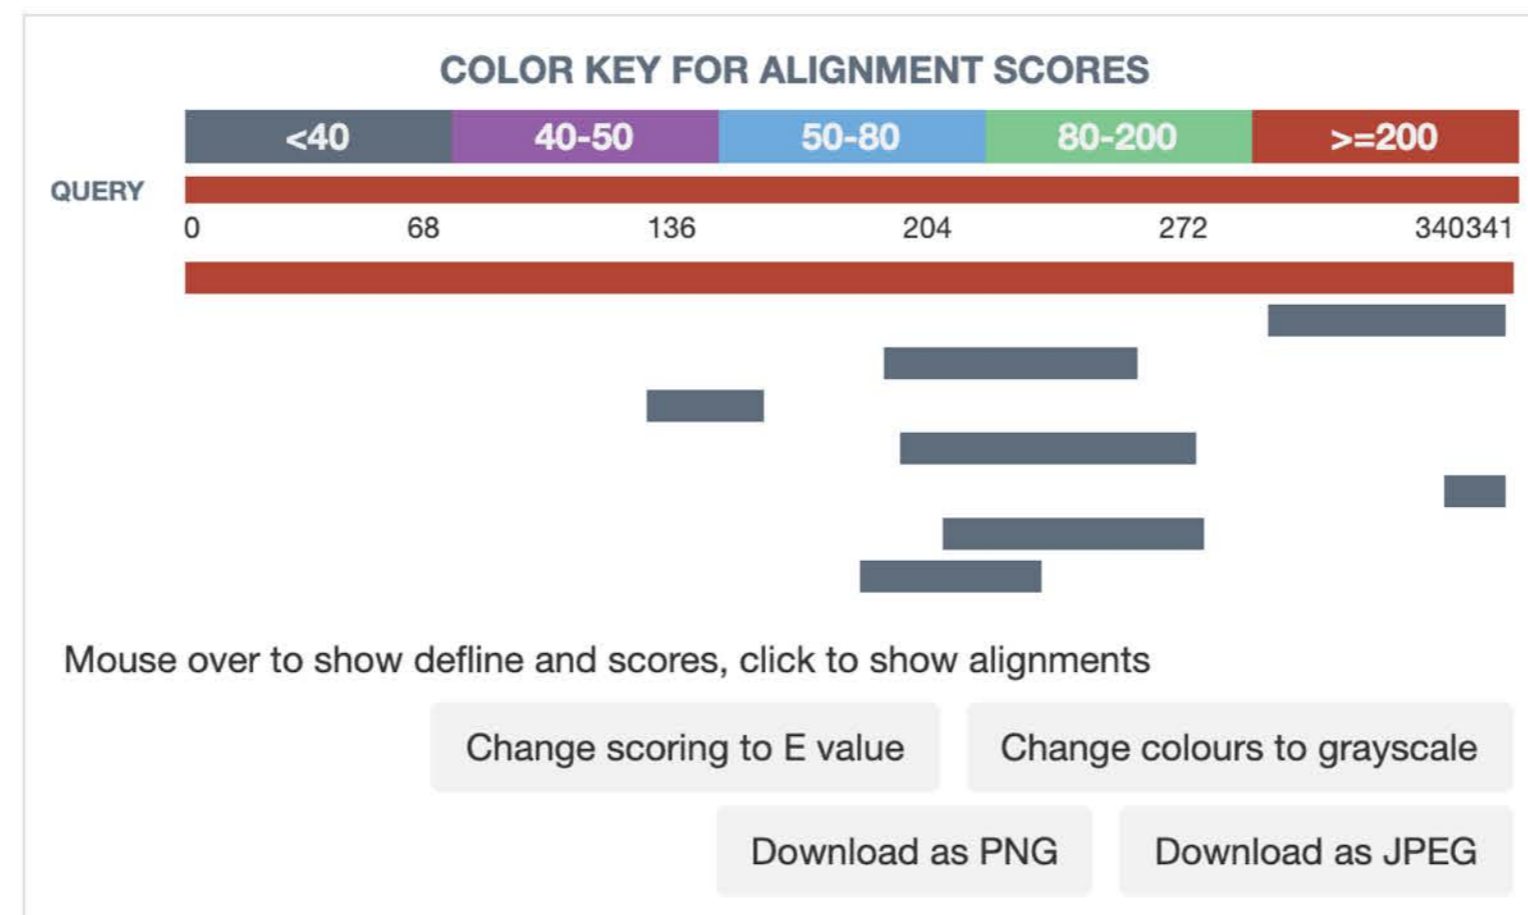

| Description                                                                                           | Max score | Total score | Query cover | E value | Identities |
|-------------------------------------------------------------------------------------------------------|-----------|-------------|-------------|---------|------------|
| P68650 Major capsid protein OS=Enterobacteria phage P21 OX=10711 GN=E PE=3 SV=1                       | 431       | 431.0       | 99%         | 3e-154  | 62%        |
| Q01076 Internal virion protein gp20 OS=Salmonella phage P22 OX=10754 GN=20 PE=1 SV=2                  | 26.2      | 26.2        | 18%         | 0.39    | 27%        |
| P10928 Baseplate wedge protein gp10 OS=Enterobacteria phage T4 OX=10665 GN=10 PE=1 SV=1               | 25.4      | 25.4        | 19%         | 0.77    | 30%        |
| P16009 Baseplate central spike complex protein gp5 OS=Enterobacteria phage T4 OX=10665 GN=5 PE=1 SV=2 | 22.7      | 22.7        | 9%          | 4.8     | 29%        |
| Q4Z9F2 Tail sheath protein OS=Staphylococcus phage Twort (strain DSM 17442) OX=1283338 PE=3 SV=1      | 22.7      | 22.7        | 22%         | 5.3     | 30%        |
| P13390 L-shaped tail fiber protein pb1 OS=Escherichia phage T5 OX=10726 GN=ltf PE=1 SV=3              | 22.3      | 22.3        | 4%          | 7.0     | 53%        |
| P25129 Attachment protein G3P OS=Pseudomonas phage Pf1 OX=2011081 GN=III PE=3 SV=1                    | 21.9      | 21.9        | 19%         | 7.8     | 28%        |
| Q6QGF0 Probable central straight fiber OS=Escherichia phage T5 OX=10726 GN=D17 PE=2 SV=1              | 21.9      | 21.9        | 13%         | 10.0    | 36%        |

[Download as CSV](#)
[Download as PNG](#)
[Download as JPEG](#)

**P68650 Major capsid protein OS=Enterobacteria phage P21 OX=10711 GN=E PE=3 SV=1**

**Score:** 431     
 **Expect:** 3e-154     
 **Identities:** 62%     
 **Positives:** 73%     
 **Gaps:** 0%

|         |   |                                                                                                                                                             |
|---------|---|-------------------------------------------------------------------------------------------------------------------------------------------------------------|
| Query   | 1 | M S M Y T T A Q L L A A N E Q K F K F D P L F L R L F F R E S Y P F T T E K V Y L S Q I P G L V N M A L Y V S P I V S G E V I R S R G G S T S E F T P G Y V |
| Subject | 1 | M + + T T Q L L E Q K K F L F L L F F R + F T E + V L + I G + A Y V S P + V G + V + R R G G T P G Y V                                                       |

[Download as PNG](#)
[Download as JPEG](#)



**C**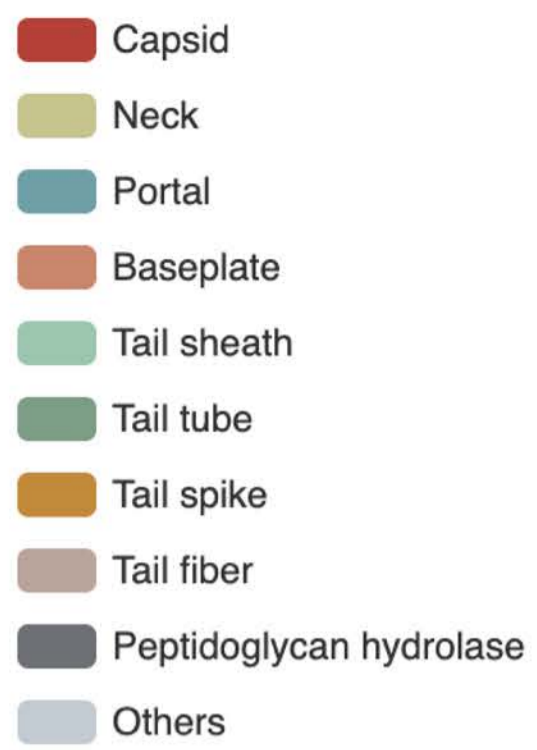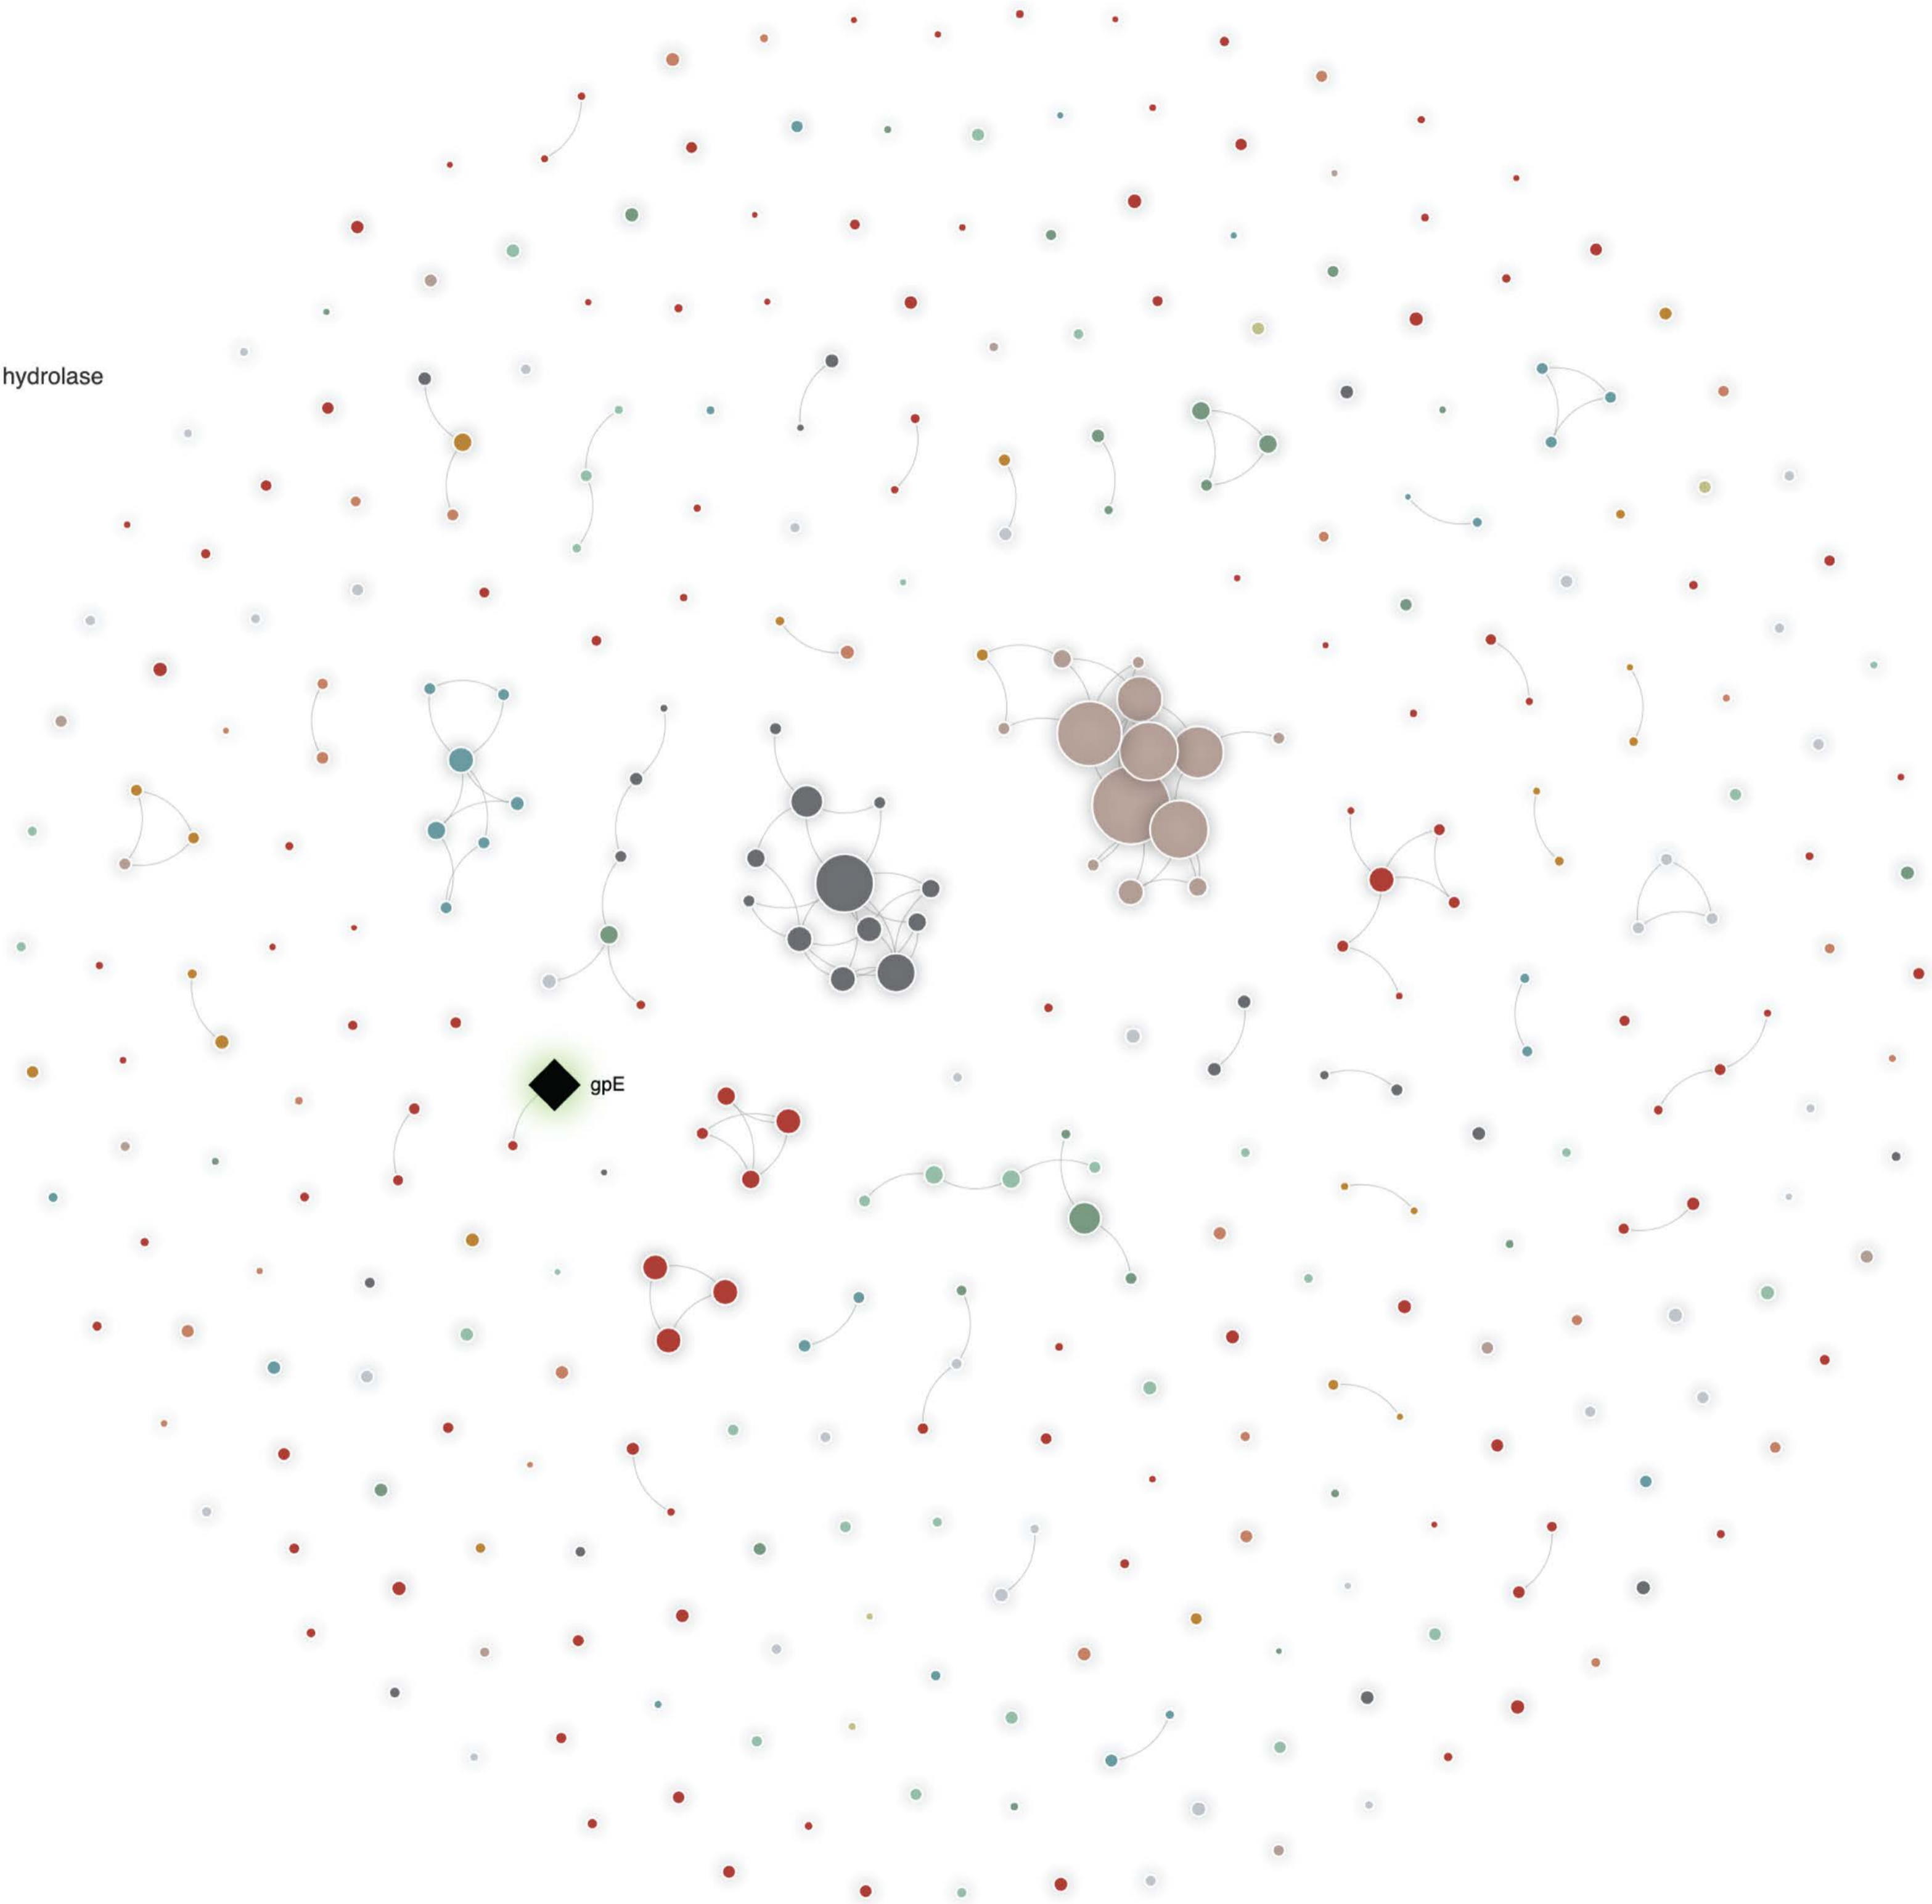

**d**

- Capsid
- Neck
- Portal
- Baseplate
- Tail sheath
- Tail tube
- Tail spike
- Tail fiber
- Peptidoglycan hydrolase
- Others

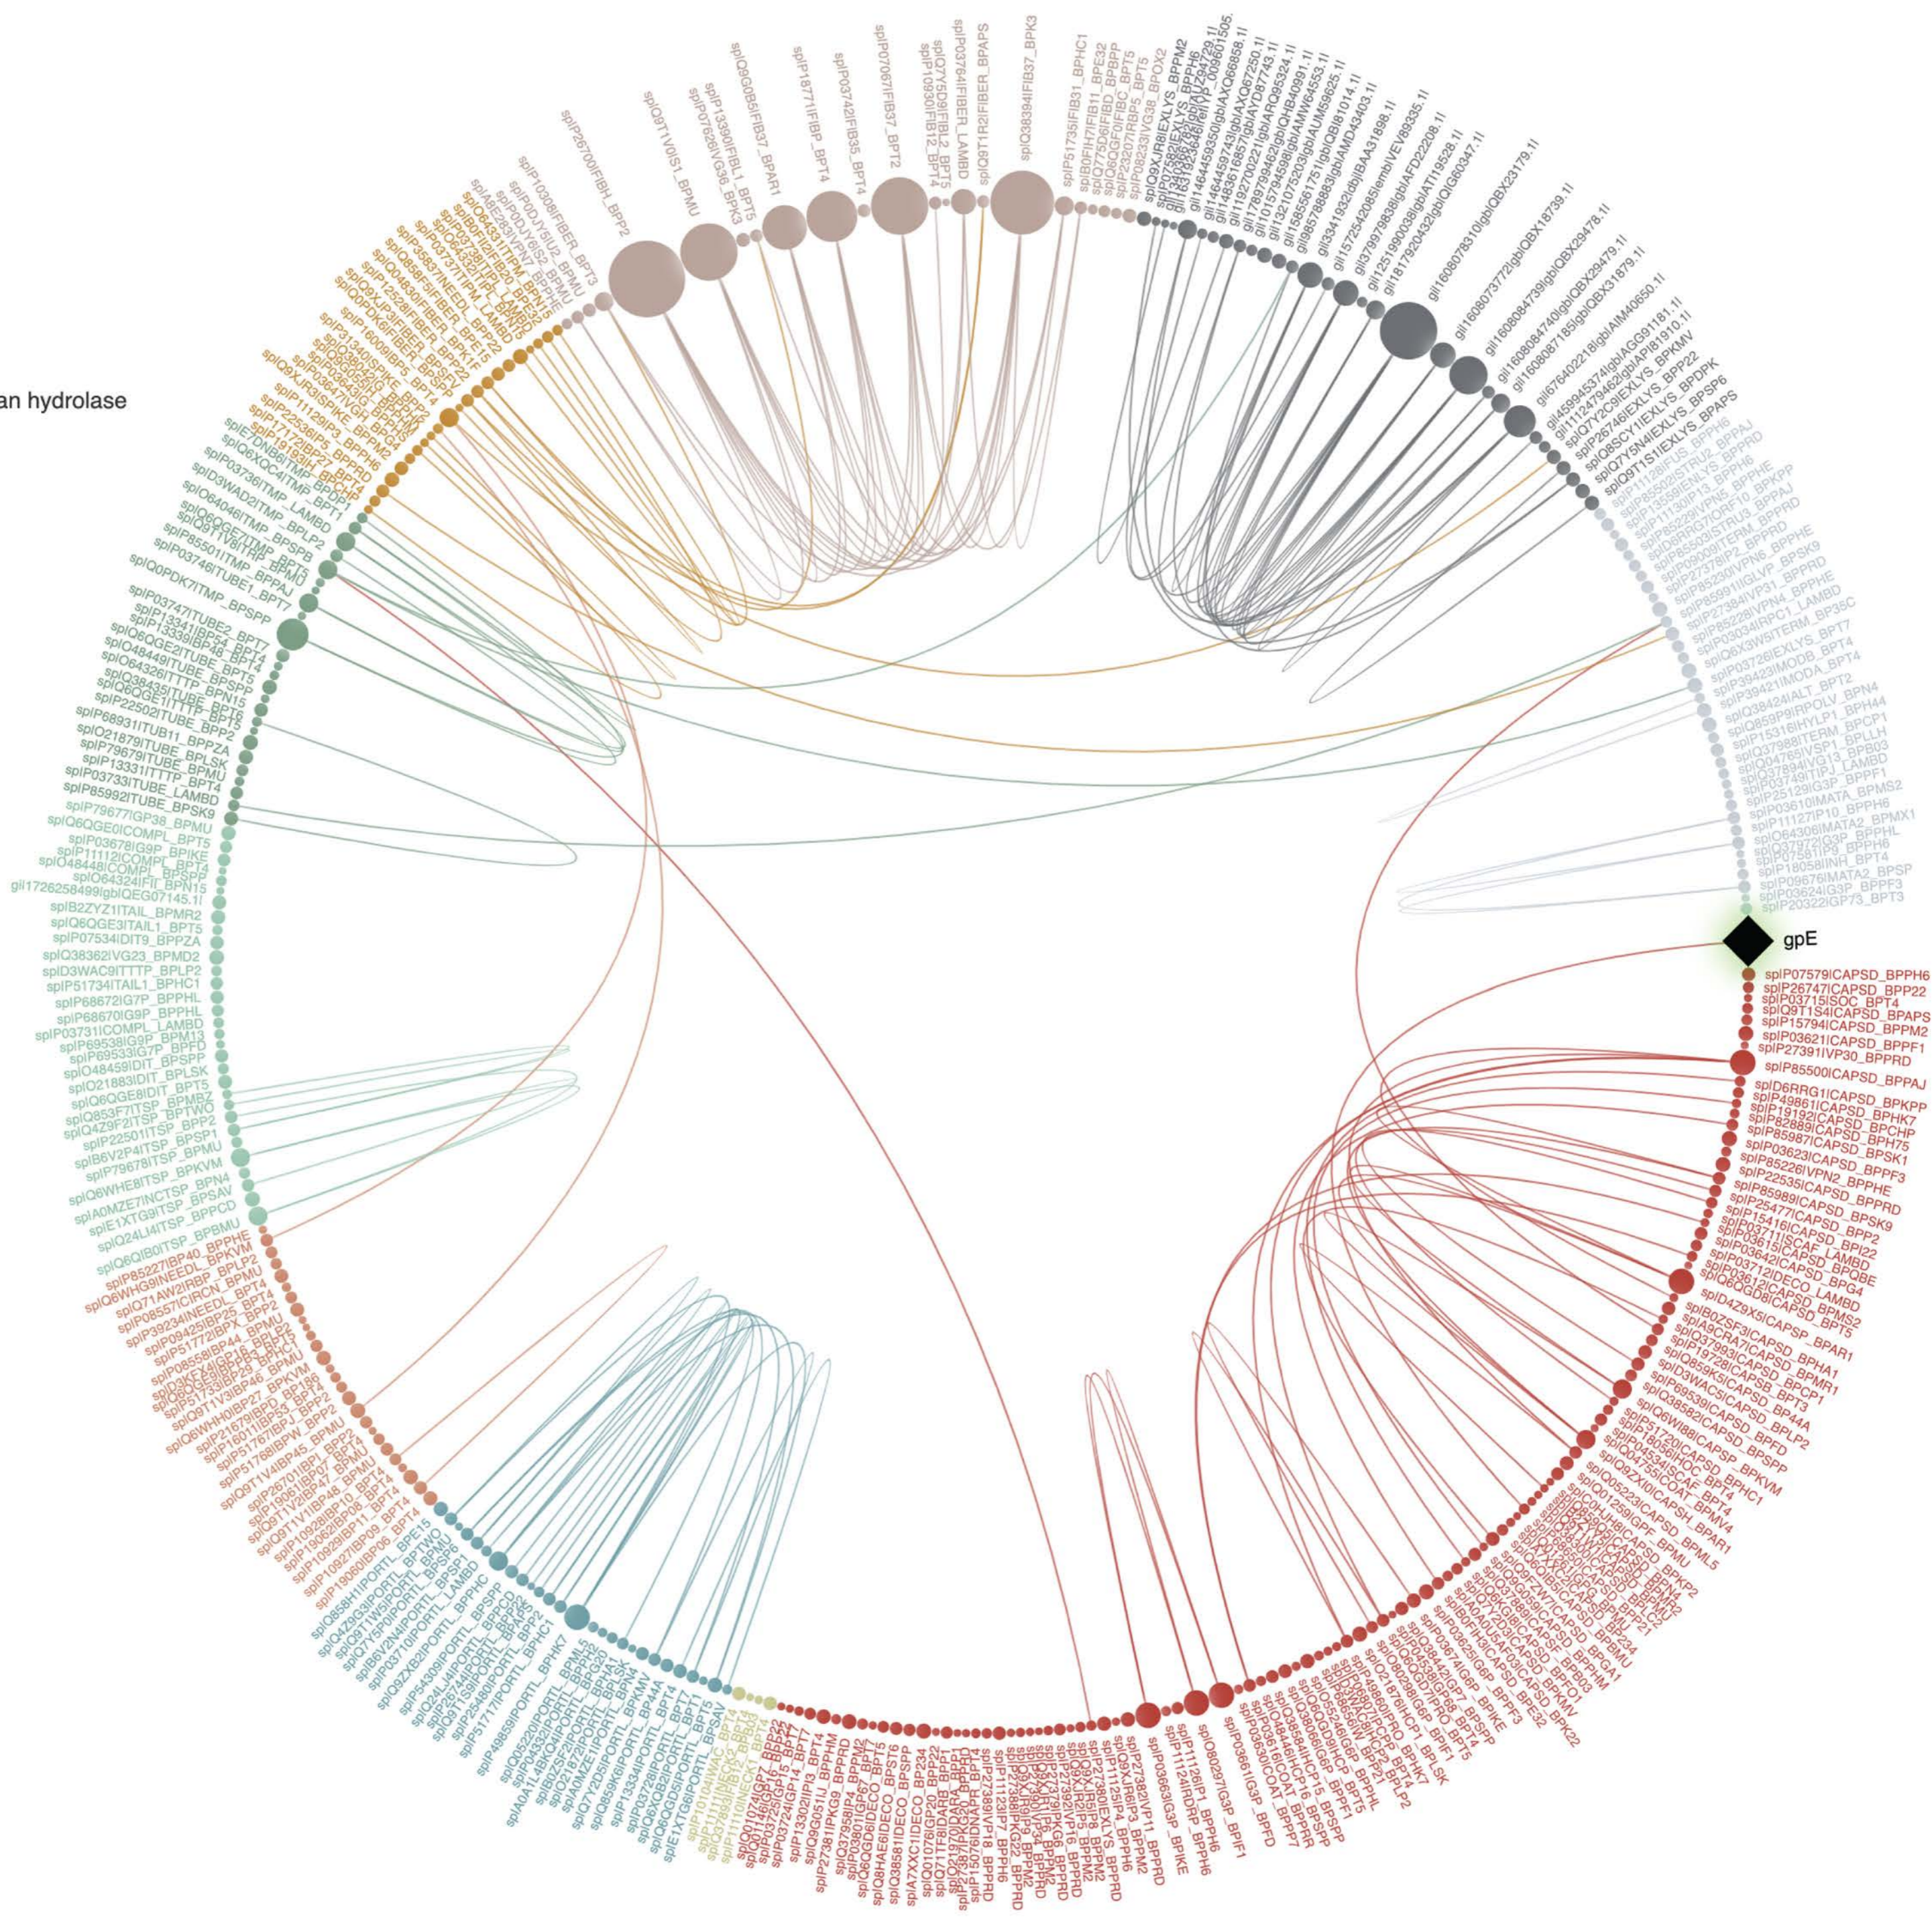

Supplement: msystems.00242-21-sf001.pdf [file msystems.00242-21-sf001.pdf]
