# Supplementary material for: Component Parts of Bacteriophage Virions Accurately Defined by a Machine-Learning Approach Built on Evolutionary Features
Source: PubMed Central journal article supplement (PMC8269216; doi:10.1128/msystems.00242-21), 2021-05-27

**a**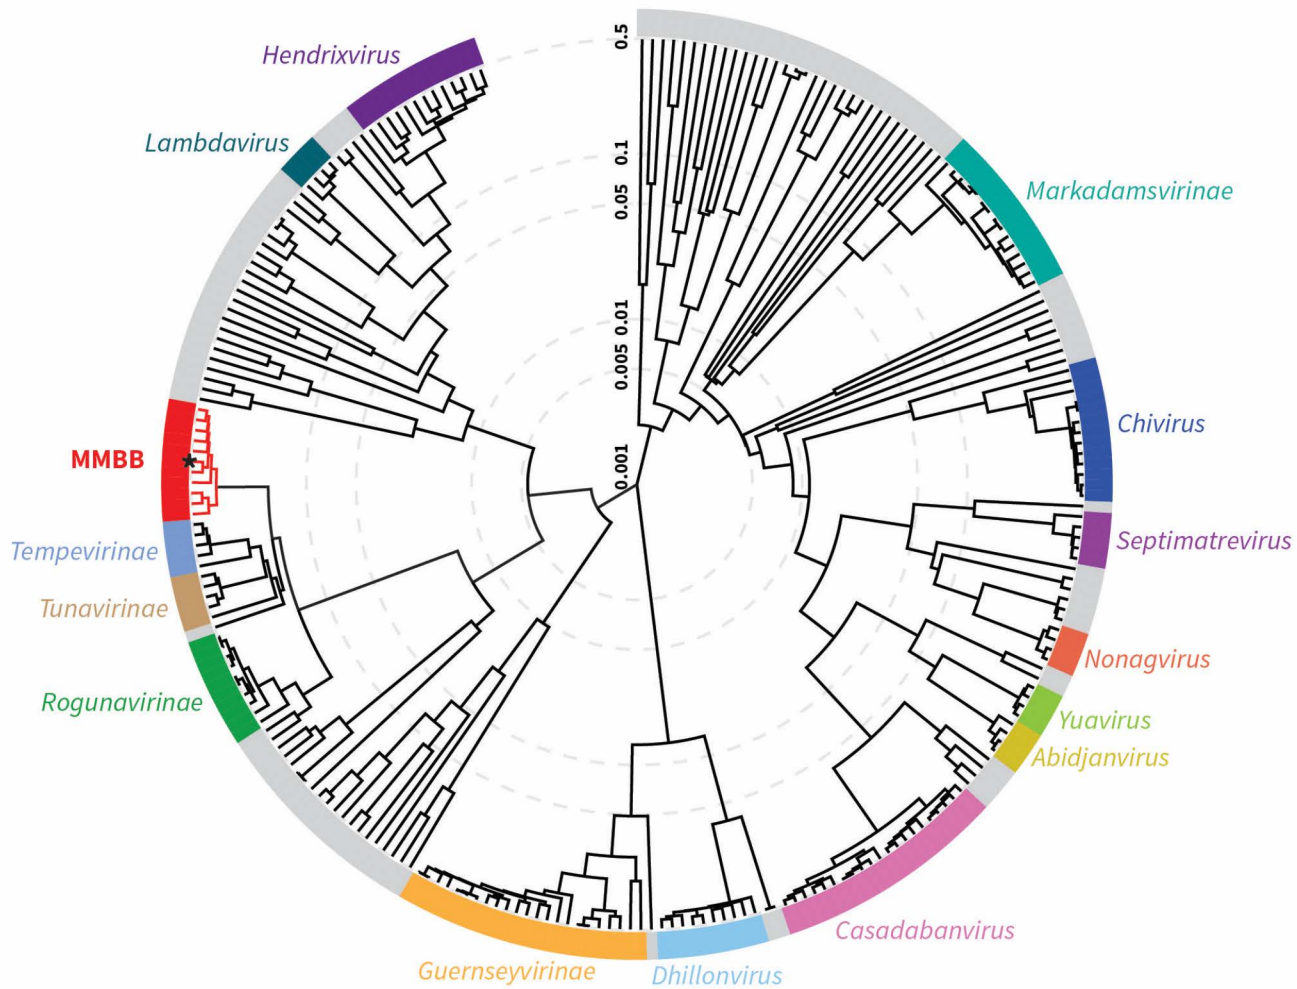**b**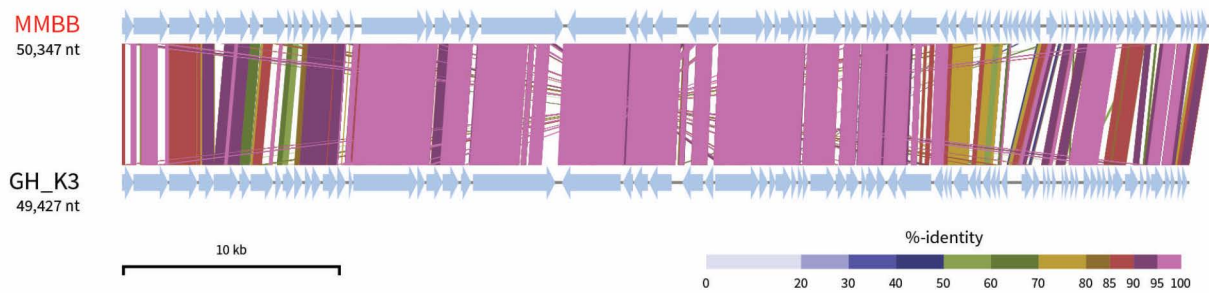

**c**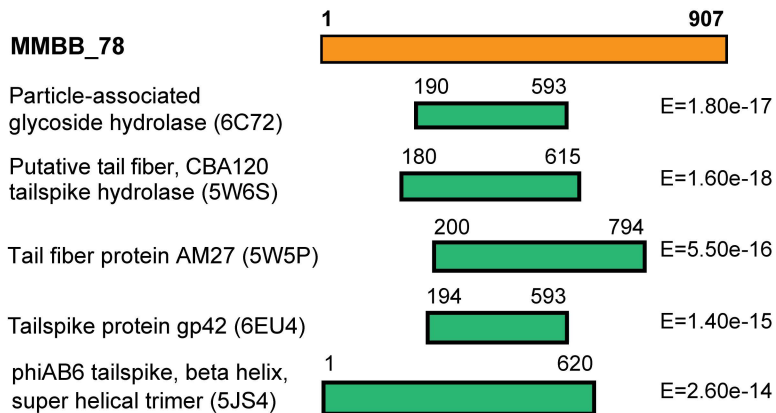**d**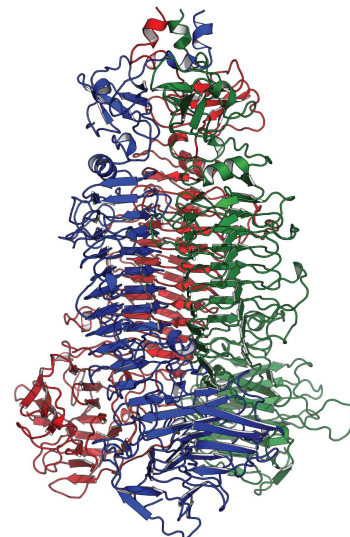**e**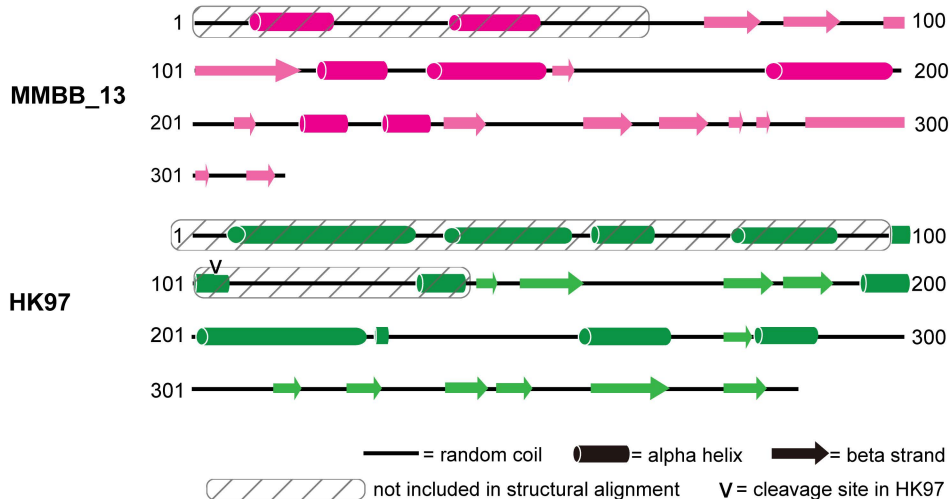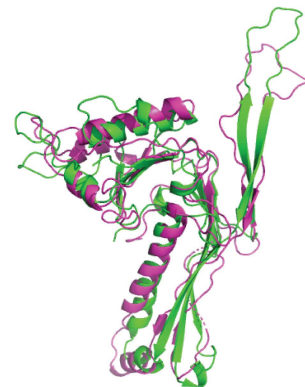

Supplement: msystems.00242-21-sf003.pdf [file msystems.00242-21-sf003.pdf]
