# Supplementary material for: Component Parts of Bacteriophage Virions Accurately Defined by a Machine-Learning Approach Built on Evolutionary Features
Source: PubMed Central journal article supplement (PMC8269216; doi:10.1128/msystems.00242-21), 2021-05-27
Supplement: msystems.00242-21-st001.pdf [file msystems.00242-21-st001.pdf]

| Encoding          | Sensitivity (SN)   | Specificity (SP)   | Accuracy (ACC)     | F-value            | Matthews correlation coefficient (MCC) |
|-------------------|--------------------|--------------------|--------------------|--------------------|----------------------------------------|
| AAC               | 0.753±0.036        | 0.782±0.040        | 0.767±0.019        | 0.762±0.020        | 0.537±0.037                            |
| DPC               | 0.754±0.017        | 0.793±0.023        | 0.774±0.013        | 0.768±0.013        | 0.548±0.028                            |
| QSOrder           | 0.770±0.018        | 0.793±0.022        | 0.780±0.020        | 0.776±0.020        | 0.565±0.038                            |
| PAAC              | 0.760±0.019        | 0.793±0.048        | 0.778±0.023        | 0.772±0.019        | 0.558±0.043                            |
| AAC-PSSM          | <b>0.817±0.017</b> | 0.858±0.022        | <b>0.837±0.017</b> | <b>0.832±0.016</b> | <b>0.675±0.035</b>                     |
| PSSM-composition  | 0.797±0.019        | 0.828±0.023        | 0.812±0.019        | 0.809±0.019        | 0.625±0.037                            |
| DPC-PSSM          | 0.778±0.010        | 0.844±0.016        | 0.811±0.009        | 0.803±0.009        | 0.622±0.019                            |
| AADP-PSSM         | 0.788±0.008        | 0.838±0.014        | 0.812±0.009        | 0.806±0.009        | 0.625±0.020                            |
| MEDP              | 0.807±0.025        | 0.825±0.024        | 0.816±0.020        | 0.813±0.021        | 0.631±0.041                            |
| STEP <sup>3</sup> | 0.803±0.025        | <b>0.864±0.015</b> | 0.833±0.017        | 0.826±0.019        | 0.667±0.034                            |
