# Supplementary material for: Component Parts of Bacteriophage Virions Accurately Defined by a Machine-Learning Approach Built on Evolutionary Features
Source: PubMed Central journal article supplement (PMC8269216; doi:10.1128/msystems.00242-21), 2021-05-27
Supplement: msystems.00242-21-st002.pdf [file msystems.00242-21-st002.pdf]

| Encoding          | Sensitivity (SN) | Specificity (SP) | Accuracy (ACC) | F-value      | Matthews correlation coefficient (MCC) |
|-------------------|------------------|------------------|----------------|--------------|----------------------------------------|
| AAC               | 0.875            | 0.812            | 0.844          | 0.848        | 0.689                                  |
| DPC               | 0.812            | 0.875            | 0.844          | 0.839        | 0.689                                  |
| QSOrder           | 0.844            | 0.844            | 0.844          | 0.844        | 0.688                                  |
| PAAC              | 0.854            | 0.833            | 0.844          | 0.845        | 0.688                                  |
| AAC-PSSM          | 0.885            | 0.854            | 0.87           | 0.872        | 0.74                                   |
| PSSM-composition  | <b>0.906</b>     | 0.844            | 0.875          | 0.879        | 0.751                                  |
| DPC-PSSM          | 0.875            | 0.844            | 0.859          | 0.862        | 0.719                                  |
| AADP-PSSM         | 0.896            | 0.865            | 0.88           | 0.882        | 0.761                                  |
| MEDP              | 0.885            | 0.854            | 0.87           | 0.872        | 0.74                                   |
| STEP <sup>3</sup> | 0.896            | <b>0.885</b>     | <b>0.891</b>   | <b>0.891</b> | <b>0.781</b>                           |
