# Supplementary material for: Component Parts of Bacteriophage Virions Accurately Defined by a Machine-Learning Approach Built on Evolutionary Features
Source: PubMed Central journal article supplement (PMC8269216; doi:10.1128/msystems.00242-21), 2021-05-27
Supplement: msystems.00242-21-st003.pdf [file msystems.00242-21-st003.pdf]

| <b>Model</b>      | <b>Sensitivity (SN)</b> | <b>Specificity (SP)</b> | <b>Accuracy (ACC)</b> | <b>F-value</b> | <b>Matthews correlation coefficient (MCC)</b> |
|-------------------|-------------------------|-------------------------|-----------------------|----------------|-----------------------------------------------|
| BLAST             | 0.271                   | <b>0.99</b>             | 0.63                  | 0.423          | 0.375                                         |
| iVIREONS          | 0.781                   | 0.698                   | 0.74                  | 0.75           | 0.481                                         |
| PVPred            | 0.385                   | 0.875                   | 0.63                  | 0.51           | 0.299                                         |
| PVP-SVM           | 0.427                   | 0.865                   | 0.646                 | 0.547          | 0.324                                         |
| Pred-BVP-Unb*     | 0.615                   | 0.917                   | 0.766                 | 0.724          | 0.557                                         |
| PVPred-SCM        | 0.51                    | 0.76                    | 0.635                 | 0.583          | 0.28                                          |
| STEP <sup>3</sup> | <b>0.896</b>            | 0.885                   | <b>0.891</b>          | <b>0.891</b>   | <b>0.781</b>                                  |
