# Supplementary material for: Component Parts of Bacteriophage Virions Accurately Defined by a Machine-Learning Approach Built on Evolutionary Features
Source: PubMed Central journal article supplement (PMC8269216; doi:10.1128/msystems.00242-21), 2021-05-27
Supplement: msystems.00242-21-st004.pdf [file msystems.00242-21-st004.pdf]

| <b>Gene</b> | <b>STEP<sup>3</sup></b> | <b>Description</b>          |
|-------------|-------------------------|-----------------------------|
| MMNM_03     | +                       | Hypothetical protein        |
| MMNM_04     | +                       | Hypothetical protein        |
| MMNM_07     | +                       | Neck protein                |
| MMNM_08     | +                       | Head closure protein        |
| MMNM_09     | +                       | Tail-completion protein     |
| MMNM_10     | +                       | Hypothetical protein        |
| MMNM_11     | +                       | Hypothetical protein        |
| MMNM_17     | +                       | Hypothetical protein        |
| MMNM_18     | +                       | Tape measure protein        |
| MMNM_19     | +                       | Lytic transglycosylase      |
| MMNM_20     | +                       | Hypothetical protein        |
| MMNM_21     | +                       | Baseplate protein           |
| MMNM_22     | +                       | Phospholipase               |
| MMNM_23     | +                       | Baseplate J-like protein    |
| MMNM_24     | +                       | Tail fibre family protein   |
| MMNM_26     | +                       | Base-plate wedge protein    |
| MMNM_27     | +                       | Putative tail-fibre protein |
| MMNM_47     | -                       | HAD superfamily hydrolase   |
| MMNM_50     | -                       | Polynucleotide kinase (PNK) |
| MMNM_55     | +                       | Portal protein              |
| MMNM_57     | -                       | Hypothetical protein        |
| MMNM_58     | +                       | Head morphogenesis protein  |
| MMNM_65     | +                       | Coil containing protein     |
| MMNM_66     | +                       | Hypothetical protein        |
| MMNM_67     | +                       | Major capsid protein        |
