# Supplementary material for: Component Parts of Bacteriophage Virions Accurately Defined by a Machine-Learning Approach Built on Evolutionary Features
Source: PubMed Central journal article supplement (PMC8269216; doi:10.1128/msystems.00242-21), 2021-05-27
Supplement: msystems.00242-21-st005.pdf [file msystems.00242-21-st005.pdf]

| Gene    | BLAST <sup>a</sup> | iVIREONS <sup>b</sup> | PVPred <sup>c</sup> | PVP-SVM <sup>d</sup> | Pred-BVP-Unb <sup>e,*</sup> | PVPred-SCM <sup>f</sup> | STEP <sup>3 g</sup> |
|---------|--------------------|-----------------------|---------------------|----------------------|-----------------------------|-------------------------|---------------------|
| MMNM_01 | -                  | 0.709                 | 0.045               | 0.092                | 0.005                       | 450.560                 | 0.072               |
| MMNM_02 | -                  | -0.418                | 0.085               | 0.070                | 0.013                       | 423.970                 | 0.218               |
| MMNM_03 | -                  | -0.717                | 0.915               | 0.600                | 0.890                       | 456.590                 | 0.750               |
| MMNM_04 | -                  | 0.878                 | 0.898               | 0.878                | 0.130                       | 537.390                 | 0.932               |
| MMNM_05 | -                  | -0.961                | 0.010               | 0.005                | 0.024                       | 454.120                 | 0.116               |
| MMNM_06 | -                  | -0.942                | 0.000               | 0.004                | 0.004                       | 441.330                 | 0.057               |
| MMNM_07 | -                  | -0.497                | 0.573               | 0.684                | 0.404                       | 472.100                 | 0.689               |
| MMNM_08 | -                  | 0.916                 | 0.311               | 0.443                | 0.159                       | 457.410                 | 0.736               |
| MMNM_09 | -                  | 0.781                 | 0.695               | 0.418                | 0.645                       | 457.670                 | 0.706               |
| MMNM_10 | -                  | 0.938                 | 0.476               | 0.695                | 0.967                       | 472.660                 | 0.968               |
| MMNM_11 | -                  | 0.995                 | 0.563               | 0.711                | 0.918                       | 495.130                 | 0.873               |
| MMNM_12 | -                  | 0.832                 | 0.144               | 0.095                | 0.002                       | 420.030                 | 0.088               |
| MMNM_13 | -                  | -0.783                | 0.004               | 0.013                | 0.002                       | 422.750                 | 0.106               |
| MMNM_14 | -                  | -0.997                | 0.337               | 0.394                | 0.105                       | 466.370                 | 0.352               |
| MMNM_15 | -                  | 0.573                 | 0.215               | 0.278                | 0.018                       | 429.450                 | 0.083               |
| MMNM_16 | -                  | -0.645                | 0.630               | 0.516                | 0.261                       | 468.390                 | 0.466               |
| MMNM_17 | -                  | -0.427                | 0.926               | 0.840                | 0.564                       | 473.380                 | 0.849               |
| MMNM_18 | -                  | 0.976                 | 0.749               | 0.737                | 0.562                       | 480.270                 | 0.907               |
| MMNM_19 | √                  | 0.988                 | 0.345               | 0.475                | 0.968                       | 473.730                 | 0.868               |
| MMNM_20 | -                  | 0.958                 | 0.921               | 0.740                | 0.250                       | 485.060                 | 0.894               |
| MMNM_21 | -                  | 0.948                 | 0.446               | 0.331                | 0.988                       | 464.490                 | 0.931               |
| MMNM_22 | -                  | 0.986                 | 0.297               | 0.145                | 0.772                       | 438.870                 | 0.679               |
| MMNM_23 | √                  | 0.996                 | 0.838               | 0.556                | 0.997                       | 477.930                 | 0.952               |
| MMNM_24 | √                  | 0.975                 | 0.432               | 0.461                | 0.961                       | 496.040                 | 0.925               |

|         |   |        |       |       |       |         |       |
|---------|---|--------|-------|-------|-------|---------|-------|
| MMNM_25 | - | -0.350 | 0.046 | 0.261 | 0.076 | 435.180 | 0.468 |
| MMNM_26 | - | 0.996  | 0.741 | 0.888 | 0.803 | 466.610 | 0.802 |
| MMNM_27 | - | 0.870  | 0.989 | 0.570 | 0.091 | 510.040 | 0.645 |
| MMNM_28 | - | -0.778 | 0.008 | 0.035 | 0.011 | 424.010 | 0.111 |
| MMNM_29 | - | -0.870 | 0.077 | 0.341 | 0.125 | 447.120 | 0.215 |
| MMNM_30 | - | 0.904  | 0.087 | 0.184 | 0.015 | 417.020 | 0.412 |
| MMNM_31 | - | -0.134 | 0.068 | 0.145 | 0.148 | 481.890 | 0.385 |
| MMNM_32 | - | -0.995 | 0.111 | 0.343 | 0.103 | 488.980 | 0.399 |
| MMNM_33 | - | -0.353 | 0.486 | 0.215 | 0.058 | 420.260 | 0.205 |
| MMNM_34 | - | -0.972 | 0.202 | 0.210 | 0.002 | 454.030 | 0.226 |
| MMNM_35 | - | 0.102  | 0.052 | 0.124 | 0.015 | 437.820 | 0.237 |
| MMNM_36 | - | -0.278 | 0.022 | 0.000 | 0.004 | 340.140 | 0.243 |
| MMNM_37 | - | -0.658 | 0.269 | 0.555 | 0.551 | 462.780 | 0.630 |
| MMNM_38 | - | -0.345 | 0.034 | 0.064 | 0.109 | 436.530 | 0.231 |
| MMNM_39 | - | -0.075 | 0.121 | 0.523 | 0.963 | 460.690 | 0.342 |
| MMNM_40 | - | 0.662  | 0.157 | 0.278 | 0.027 | 509.800 | 0.238 |
| MMNM_41 | - | -0.988 | 0.149 | 0.010 | 0.208 | 367.150 | 0.136 |
| MMNM_42 | - | -0.443 | 0.087 | 0.136 | 0.128 | 447.920 | 0.269 |
| MMNM_43 | - | 0.629  | 0.230 | 0.158 | 0.025 | 450.150 | 0.397 |
| MMNM_44 | - | -0.952 | 0.262 | 0.124 | 0.007 | 428.910 | 0.338 |
| MMNM_45 | - | 0.456  | 0.063 | 0.066 | 0.003 | 466.480 | 0.142 |
| MMNM_46 | - | -0.355 | 0.191 | 0.194 | 0.609 | 469.240 | 0.157 |
| MMNM_47 | - | -0.769 | 0.021 | 0.032 | 0.024 | 443.840 | 0.136 |
| MMNM_48 | - | -0.959 | 0.428 | 0.117 | 0.011 | 495.500 | 0.280 |
| MMNM_49 | - | -0.924 | 0.111 | 0.070 | 0.630 | 453.810 | 0.199 |
| MMNM_50 | - | 0.031  | 0.063 | 0.138 | 0.006 | 464.010 | 0.290 |
| MMNM_51 | - | -0.988 | 0.005 | 0.617 | 0.023 | 411.650 | 0.159 |

|         |   |        |       |       |       |         |       |
|---------|---|--------|-------|-------|-------|---------|-------|
| MMNM_52 | - | 0.523  | 0.007 | 0.019 | 0.004 | 423.960 | 0.101 |
| MMNM_53 | - | 0.794  | 0.076 | 0.263 | 0.056 | 439.390 | 0.305 |
| MMNM_54 | - | -0.966 | 0.039 | 0.152 | 0.023 | 428.100 | 0.092 |
| MMNM_55 | - | 0.874  | 0.165 | 0.459 | 0.284 | 455.270 | 0.929 |
| MMNM_56 | - | 0.533  | 0.104 | 0.021 | 0.010 | 432.160 | 0.156 |
| MMNM_57 | - | -0.991 | 0.083 | 0.043 | 0.015 | 400.700 | 0.190 |
| MMNM_58 | - | -0.189 | 0.561 | 0.362 | 0.219 | 454.010 | 0.823 |
| MMNM_59 | - | -0.055 | 0.020 | 0.441 | 0.026 | 443.610 | 0.604 |
| MMNM_60 | - | -0.165 | 0.086 | 0.038 | 0.024 | 417.150 | 0.197 |
| MMNM_61 | - | 0.770  | 0.244 | 0.207 | 0.013 | 468.320 | 0.265 |
| MMNM_62 | - | 0.996  | 0.963 | 0.032 | 0.777 | 501.030 | 0.525 |
| MMNM_63 | - | 0.919  | 0.392 | 0.279 | 0.142 | 453.180 | 0.600 |
| MMNM_64 | - | -0.611 | 0.448 | 0.018 | 0.001 | 454.960 | 0.208 |
| MMNM_65 | - | 0.609  | 0.382 | 0.579 | 0.120 | 457.060 | 0.529 |
| MMNM_66 | - | 0.199  | 0.917 | 0.935 | 0.856 | 502.110 | 0.948 |
| MMNM_67 | - | 0.883  | 0.684 | 0.466 | 0.924 | 474.930 | 0.980 |
