# Supplementary material for: Component Parts of Bacteriophage Virions Accurately Defined by a Machine-Learning Approach Built on Evolutionary Features
Source: PubMed Central journal article supplement (PMC8269216; doi:10.1128/msystems.00242-21), 2021-05-27
Supplement: msystems.00242-21-st006.pdf [file msystems.00242-21-st006.pdf]

| Gene    | BLAST <sup>a</sup> | iVIREONS <sup>b</sup> | PVPred <sup>c</sup> | PVP-SVM <sup>d</sup> | Pred-BVP-Unb <sup>e,*</sup> | PVPred-SCM <sup>f</sup> | STEP <sup>3 g</sup> |
|---------|--------------------|-----------------------|---------------------|----------------------|-----------------------------|-------------------------|---------------------|
| MMBB_01 | -                  | 0.772                 | 0.635               | 0.419                | 0.078                       | 476.910                 | 0.546               |
| MMBB_02 | -                  | -0.842                | 0.028               | 0.066                | 0.003                       | 455.890                 | 0.217               |
| MMBB_03 | √                  | 0.926                 | 0.370               | 0.198                | 0.278                       | 455.820                 | 0.793               |
| MMBB_04 | √                  | 0.874                 | 0.697               | 0.922                | 0.807                       | 461.750                 | 0.783               |
| MMBB_05 | √                  | 0.997                 | 0.476               | 0.400                | 0.954                       | 465.510                 | 0.905               |
| MMBB_06 | √                  | -0.845                | 0.167               | 0.367                | 0.021                       | 430.440                 | 0.521               |
| MMBB_07 | -                  | 0.718                 | 0.500               | 0.856                | 0.995                       | 472.240                 | 0.953               |
| MMBB_08 | -                  | -0.803                | 0.318               | 0.187                | 0.074                       | 429.970                 | 0.846               |
| MMBB_09 | -                  | 0.852                 | 0.747               | 0.545                | 0.773                       | 469.600                 | 0.897               |
| MMBB_10 | -                  | -0.327                | 0.691               | 0.868                | 0.550                       | 486.520                 | 0.846               |
| MMBB_11 | -                  | -0.425                | 0.190               | 0.209                | 0.077                       | 444.040                 | 0.668               |
| MMBB_12 | -                  | -0.170                | 0.035               | 0.050                | 0.018                       | 392.970                 | 0.129               |
| MMBB_13 | -                  | 0.265                 | 0.257               | 0.563                | 0.885                       | 443.440                 | 0.975               |
| MMBB_14 | -                  | 0.963                 | 0.272               | 0.429                | 0.793                       | 488.430                 | 0.931               |
| MMBB_15 | -                  | 0.124                 | 0.223               | 0.275                | 0.220                       | 448.710                 | 0.561               |
| MMBB_16 | -                  | -0.710                | 0.010               | 0.028                | 0.000                       | 427.360                 | 0.145               |
| MMBB_17 | -                  | -0.414                | 0.220               | 0.091                | 0.013                       | 462.160                 | 0.698               |
| MMBB_18 | -                  | 0.231                 | 0.101               | 0.366                | 0.938                       | 443.030                 | 0.951               |
| MMBB_19 | -                  | -0.652                | 0.087               | 0.218                | 0.007                       | 428.060                 | 0.110               |
| MMBB_20 | -                  | 0.501                 | 0.243               | 0.190                | 0.001                       | 449.720                 | 0.304               |
| MMBB_21 | -                  | -0.997                | 0.249               | 0.467                | 0.025                       | 430.100                 | 0.082               |
| MMBB_22 | -                  | -0.809                | 0.104               | 0.112                | 0.024                       | 454.640                 | 0.434               |
| MMBB_23 | -                  | -0.909                | 0.054               | 0.046                | 0.033                       | 413.020                 | 0.335               |
| MMBB_24 | -                  | -0.767                | 0.173               | 0.289                | 0.036                       | 413.820                 | 0.259               |

|         |   |        |       |       |       |         |       |
|---------|---|--------|-------|-------|-------|---------|-------|
| MMBB_25 | - | 0.816  | 0.253 | 0.350 | 0.058 | 454.970 | 0.411 |
| MMBB_26 | - | -0.872 | 0.006 | 0.100 | 0.001 | 412.840 | 0.110 |
| MMBB_27 | - | -0.973 | 0.023 | 0.007 | 0.029 | 396.230 | 0.208 |
| MMBB_28 | - | -0.629 | 0.067 | 0.074 | 0.165 | 441.720 | 0.245 |
| MMBB_29 | - | -0.954 | 0.859 | 0.957 | 0.180 | 506.680 | 0.422 |
| MMBB_30 | - | -0.955 | 0.029 | 0.252 | 0.103 | 425.270 | 0.217 |
| MMBB_31 | - | -0.991 | 0.094 | 0.211 | 0.023 | 451.290 | 0.327 |
| MMBB_32 | - | -0.984 | 0.008 | 0.103 | 0.018 | 391.850 | 0.137 |
| MMBB_33 | - | -0.998 | 0.442 | 0.022 | 0.417 | 431.780 | 0.290 |
| MMBB_34 | - | -0.343 | 0.322 | 0.542 | 0.026 | 439.710 | 0.243 |
| MMBB_35 | - | -0.235 | 0.029 | 0.048 | 0.014 | 434.090 | 0.201 |
| MMBB_36 | - | -0.196 | 0.251 | 0.140 | 0.031 | 465.340 | 0.439 |
| MMBB_37 | - | 0.412  | 0.198 | 0.246 | 0.075 | 468.890 | 0.868 |
| MMBB_38 | - | -0.845 | 0.048 | 0.078 | 0.022 | 444.320 | 0.226 |
| MMBB_39 | - | -0.149 | 0.251 | 0.013 | 0.027 | 461.530 | 0.186 |
| MMBB_40 | - | -0.584 | 0.006 | 0.005 | 0.004 | 417.030 | 0.109 |
| MMBB_41 | - | -0.998 | 0.546 | 0.021 | 0.012 | 415.410 | 0.149 |
| MMBB_42 | - | -0.647 | 0.021 | 0.053 | 0.138 | 434.370 | 0.507 |
| MMBB_43 | - | -0.566 | 0.490 | 0.380 | 0.022 | 459.290 | 0.396 |
| MMBB_44 | - | -0.468 | 0.294 | 0.087 | 0.058 | 441.050 | 0.536 |
| MMBB_45 | - | -0.304 | 0.081 | 0.093 | 0.015 | 460.930 | 0.165 |
| MMBB_46 | - | -0.986 | 0.000 | 0.029 | 0.007 | 447.110 | 0.190 |
| MMBB_47 | - | -0.525 | 0.026 | 0.113 | 0.575 | 452.330 | 0.149 |
| MMBB_48 | - | -0.590 | 0.012 | 0.064 | 0.003 | 404.360 | 0.122 |
| MMBB_49 | - | -0.078 | 0.836 | 0.528 | 0.027 | 464.190 | 0.731 |
| MMBB_50 | - | -0.394 | 0.198 | 0.005 | 0.006 | 448.760 | 0.202 |
| MMBB_51 | - | 0.981  | 0.883 | 0.720 | 0.050 | 488.660 | 0.550 |

|         |   |        |       |       |       |         |       |
|---------|---|--------|-------|-------|-------|---------|-------|
| MMBB_52 | - | 0.982  | 0.826 | 0.113 | 0.244 | 486.000 | 0.515 |
| MMBB_53 | - | -0.361 | 0.238 | 0.005 | 0.018 | 432.360 | 0.062 |
| MMBB_54 | - | -0.821 | 0.097 | 0.085 | 0.009 | 445.550 | 0.294 |
| MMBB_55 | - | -0.960 | 0.052 | 0.049 | 0.005 | 453.530 | 0.151 |
| MMBB_56 | - | -0.256 | 0.008 | 0.008 | 0.006 | 452.340 | 0.142 |
| MMBB_57 | - | -0.547 | 0.576 | 0.187 | 0.024 | 462.900 | 0.222 |
| MMBB_58 | - | -0.170 | 0.262 | 0.211 | 0.135 | 450.870 | 0.097 |
| MMBB_59 | - | 0.093  | 0.080 | 0.020 | 0.009 | 428.560 | 0.056 |
| MMBB_60 | - | 0.924  | 0.517 | 0.817 | 0.138 | 505.490 | 0.674 |
| MMBB_61 | - | -0.602 | 0.123 | 0.234 | 0.011 | 463.530 | 0.310 |
| MMBB_62 | - | 0.179  | 0.955 | 0.015 | 0.039 | 487.090 | 0.677 |
| MMBB_63 | - | -0.998 | 0.031 | 0.082 | 0.105 | 414.570 | 0.359 |
| MMBB_64 | - | 0.585  | 0.032 | 0.057 | 0.005 | 443.890 | 0.252 |
| MMBB_65 | - | -0.987 | 0.035 | 0.161 | 0.613 | 438.860 | 0.168 |
| MMBB_66 | - | -1.000 | 0.005 | 0.060 | 0.003 | 436.060 | 0.160 |
| MMBB_67 | - | -0.974 | 0.026 | 0.358 | 0.024 | 481.390 | 0.525 |
| MMBB_68 | - | -0.999 | 0.199 | 0.015 | 0.025 | 422.180 | 0.126 |
| MMBB_69 | - | -0.385 | 0.090 | 0.238 | 0.001 | 449.050 | 0.080 |
| MMBB_70 | - | 0.173  | 0.019 | 0.119 | 0.028 | 444.000 | 0.352 |
| MMBB_71 | - | -0.999 | 0.149 | 0.105 | 0.015 | 452.960 | 0.301 |
| MMBB_72 | - | -0.411 | 0.140 | 0.113 | 0.106 | 439.260 | 0.272 |
| MMBB_73 | - | -0.109 | 0.072 | 0.026 | 0.016 | 446.000 | 0.177 |
| MMBB_74 | - | -0.852 | 0.015 | 0.136 | 0.110 | 440.660 | 0.250 |
| MMBB_75 | - | -0.069 | 0.347 | 0.343 | 0.503 | 447.320 | 0.188 |
| MMBB_76 | - | 0.374  | 0.099 | 0.103 | 0.428 | 429.680 | 0.406 |
| MMBB_77 | - | 0.992  | 0.225 | 0.110 | 0.007 | 433.260 | 0.415 |
| MMBB_78 | √ | 0.932  | 0.612 | 0.453 | 0.981 | 482.060 | 0.968 |

|         |   |       |       |       |       |         |       |
|---------|---|-------|-------|-------|-------|---------|-------|
| MMBB_79 | √ | 0.986 | 0.756 | 0.684 | 0.975 | 475.560 | 0.932 |
|---------|---|-------|-------|-------|-------|---------|-------|
