# Supplementary material for: Component Parts of Bacteriophage Virions Accurately Defined by a Machine-Learning Approach Built on Evolutionary Features
Source: PubMed Central journal article supplement (PMC8269216; doi:10.1128/msystems.00242-21), 2021-05-27
Supplement: msystems.00242-21-st007.pdf [file msystems.00242-21-st007.pdf]

| <b>Gene</b> | <b>STEP<sup>3</sup></b> | <b>Description</b>                     |
|-------------|-------------------------|----------------------------------------|
| MMBB_01     | +                       | Putative tail assembly protein         |
| MMBB_03     | +                       | Putative minor tail protein            |
| MMBB_04     | +                       | Minor tail protein                     |
| MMBB_05     | +                       | Tail length tape-measure protein       |
| MMBB_06     | +                       | Tail assembly chaperone                |
| MMBB_07     | +                       | Major tail protein                     |
| MMBB_08     | +                       | Minor tail protein                     |
| MMBB_09     | +                       | Putative neck protein                  |
| MMBB_10     | +                       | Head-to-tail connector protein         |
| MMBB_11     | +                       | Head-to-tail connector complex protein |
| MMBB_13     | +                       | Major capsid protein/DUF2184 protein   |
| MMBB_14     | +                       | Capsid decoration protein              |
| MMBB_15     | +                       | Major capsid protein                   |
| MMBB_16     | -                       | AP2 domain protein                     |
| MMBB_17     | +                       | Head morphogenesis protein             |
| MMBB_18     | +                       | Putative portal protein                |
| MMBB_21     | -                       | Hypothetical protein                   |
| MMBB_31     | -                       | Hypothetical protein                   |
| MMBB_52     | +                       | Hypothetical protein                   |
| MMBB_60     | +                       | Membrane protein                       |
| MMBB_61     | -                       | Endolysin                              |
| MMBB_62     | +                       | Putative holin                         |
| MMBB_63     | -                       | Nucleoside triphosphate hydrolase      |
| MMBB_64     | -                       | Polynucleotide kinase (PNK)            |
| MMBB_65     | -                       | Putative phosphoesterase               |
| MMBB_70     | -                       | Hypothetical protein                   |
| MMBB_76     | -                       | Putative recombination protein         |
| MMBB_78     | +                       | Depolymerase                           |
| MMBB_79     | +                       | Tail fibre protein                     |
